# Supplementary material for: Catchments catch all in South African coastal lowlands: topography and palaeoclimate restricted gene flow in Nymania capensis (Meliaceae)—a multilocus phylogeographic and distribution modelling approach
Source: PeerJ journal article supplement (doi:10.7717/peerj.2965), 2017-01-31
Supplement: SupplementalInformationFiles.zip [file SupplementalInformationFiles.zip]

| Province/Region | District/<br>Constituency | Voucher<br>Specimen | Latitude   | Longitude | Chloroplast<br>hapotype | ITS Cluster | ncpGS<br>haplotype |
|-----------------|---------------------------|---------------------|------------|-----------|-------------------------|-------------|--------------------|
| Eastern Cape    | Hankey                    | AJP0517             | -33.806600 | 24.728710 | R                       | 2           | <i>k</i>           |
|                 |                           | AJP0518             | -33.820320 | 24.729750 | R                       | 2           | <i>k</i>           |
|                 | Humansdorp<br>Jansenville | AJP0586             | -33.860020 | 24.255359 | R                       | 2           | <i>m</i>           |
|                 |                           | AJP0444             | -33.215200 | 24.839900 | N                       | 3           | <i>k</i>           |
|                 |                           | AJP0446             | -32.755600 | 24.723500 | L                       | 3           | <i>k</i>           |
|                 |                           | AJP0466             | -33.210417 | 24.839944 | L                       | 3           | -                  |
|                 |                           | AJP0490             | -32.731370 | 24.709310 | N                       | 3           | <i>k</i>           |
|                 |                           | AJP0492             | -32.839710 | 24.713340 | N                       | 3           | <i>k</i>           |
|                 |                           | AJP0495             | -33.000480 | 24.745880 | N                       | 3           | <i>k</i>           |
|                 |                           | AJP0498             | -33.029240 | 24.811260 | N                       | 3           | -                  |
|                 |                           | AJP0628             | -33.092010 | 24.886390 | N                       | 3           | <i>l</i>           |
|                 |                           | AJP0632             | -33.077230 | 25.035360 | N                       | 3           | <i>k</i>           |
|                 | Pearston                  | AJP0726             | -32.484020 | 25.203250 | K                       | 3           | <i>k</i>           |
|                 |                           | AJP0729             | -32.485970 | 25.234490 | Q                       | 3           | <i>k</i>           |
|                 | Somerset East             | AJP0465             | -33.251306 | 25.442722 | M                       | 3           | <i>k</i>           |
|                 |                           | AJP0633             | -33.070510 | 25.176080 | O                       | 3           | <i>k</i>           |
|                 |                           | AJP0637             | -33.039110 | 25.282500 | O                       | 3           | <i>k</i>           |
|                 |                           | AJP0718             | -32.624990 | 25.455020 | K                       | 3           | <i>k</i>           |
|                 |                           | AJP0722             | -32.679940 | 25.344410 | Q                       | 3           | <i>k</i>           |
|                 | Steytlerville             | AJP0744             | -33.107720 | 25.897590 | K                       | 3           | <i>k</i>           |
|                 |                           | AJP0537             | -33.329350 | 24.674060 | R                       | 3           | <i>j</i>           |
|                 |                           | AJP0540             | -33.309960 | 24.358470 | R                       | 2           | <i>i</i>           |
|                 |                           | AJP0545             | -33.226750 | 24.198500 | T                       | 2           | <i>i</i>           |
|                 |                           | AJP0551             | -33.276000 | 24.134070 | R                       | 2           | <i>k</i>           |
|                 | Uitenhage                 | AJP0553             | -33.228690 | 24.088070 | R                       | 2           | <i>j</i>           |
|                 |                           | AJP0810             | -33.426440 | 24.568880 | R                       | 4           | <i>k</i>           |
|                 |                           | AJP0500             | -33.341830 | 24.909610 | L                       | 3           | <i>k</i>           |
|                 |                           | AJP0532             | -33.342660 | 24.873420 | K                       | 3           | <i>k</i>           |
|                 |                           | AJP0533             | -33.364260 | 24.818660 | N                       | 3           | <i>k</i>           |
|                 | Willowmore                | AJP0814             | -33.626520 | 25.436450 | P                       | 3           | <i>k</i>           |
|                 |                           | AJP0822             | -33.542490 | 25.119780 | L                       | 3           | <i>k</i>           |
|                 |                           | AJP0259             | -33.517931 | 23.751302 | R                       | -           | <i>k</i>           |
|                 |                           | AJP0269             | -33.508563 | 23.782502 | S                       | 2           | <i>g</i>           |
|                 |                           | AJP0270             | -33.513244 | 23.780121 | S                       | 2           | <i>k</i>           |
|                 |                           | AJP0273             | -33.521486 | 23.760162 | R                       | 2           | <i>k</i>           |
|                 |                           | AJP0555             | -33.143820 | 23.841080 | R                       | 2           | -                  |
|                 |                           | AJP0557             | -33.094920 | 23.912550 | R                       | 2           | <i>i</i>           |
|                 |                           | AJP0774             | -33.275740 | 23.288660 | F                       | 1           | -                  |
|                 |                           | AJP0780             | -33.399970 | 23.675520 | R                       | 2           | -                  |

| Province/Region | District/<br>Constituency | Voucher<br>Specimen | Latitude   | Longitude | Chloroplast<br>hapotype | ITS Cluster | ncpGS<br>haplotype |
|-----------------|---------------------------|---------------------|------------|-----------|-------------------------|-------------|--------------------|
| Northern Cape   | Namakwaland               | BOL48535            | -28.256006 | 17.241669 | U                       | -           | <i>g</i>           |
|                 |                           | BOL60966            | -28.316668 | 17.249999 | V                       | -           | -                  |
| Western Cape    | Calitzdorp                | AJP0347             | -33.634659 | 21.697334 | E                       | 1           | <i>a</i>           |
|                 |                           | AJP0358             | -33.646765 | 21.644877 | G                       | 1           | <i>a</i>           |
|                 |                           | AJP0359             | -33.652930 | 21.639690 | G                       | 1           | <i>a</i>           |
|                 | George                    | AJP0312             | -33.690933 | 22.269231 | J                       | 1           | <i>a</i>           |
|                 | Ladismith                 | AJP0042             | -33.705970 | 20.968903 | H                       | 1           | -                  |
|                 |                           | AJP0050             | -33.593233 | 21.201433 | B                       | 1           | <i>a</i>           |
|                 |                           | AJP0057             | -33.474133 | 21.517933 | B                       | 1           | <i>a</i>           |
|                 |                           | AJP0083             | -33.515213 | 21.137982 | B                       | 1           | <i>a</i>           |
|                 |                           | AJP0084             | -33.512422 | 21.097586 | B                       | 1           | <i>d</i>           |
|                 |                           | AJP0103             | -33.478789 | 20.915313 | B                       | 1           | <i>a</i>           |
|                 |                           | AJP0113             | -33.457254 | 20.871332 | B                       | 1           | <i>a</i>           |
|                 |                           | AJP0117             | -33.502843 | 20.800455 | F                       | 1           | <i>a</i>           |
|                 |                           | AJP0120             | -33.531895 | 20.746276 | F                       | 1           | <i>h</i>           |
|                 |                           | AJP0121             | -33.536824 | 20.748489 | H                       | 1           | -                  |
|                 |                           | AJP0129             | -33.564117 | 20.695078 | F                       | 1           | <i>a</i>           |
|                 | Oudtshoorn                | AJP0146             | -33.608824 | 20.626011 | B                       | 1           | <i>a</i>           |
|                 |                           | AJP0021             | -33.509060 | 22.010440 | A                       | 1           | <i>a</i>           |
|                 |                           | AJP0065             | -33.539567 | 22.293967 | A                       | 1           | <i>a</i>           |
|                 |                           | AJP0071             | -33.548433 | 22.463717 | A                       | 1           | -                  |
|                 |                           | AJP0074             | -33.487867 | 22.561767 | F                       | 1           | -                  |
|                 |                           | AJP0081             | -33.490200 | 22.631383 | A                       | 1           | <i>a</i>           |
|                 |                           | AJP0224             | -33.610121 | 22.405158 | F                       | 1           | <i>c</i>           |
|                 |                           | AJP0229             | -33.635754 | 22.403977 | A                       | 1           | <i>a</i>           |
|                 |                           | AJP0232             | -33.454246 | 22.560153 | A                       | 1           | <i>e</i>           |
|                 |                           | AJP0278             | -33.428425 | 22.252120 | C                       | 1           | <i>c</i>           |
|                 |                           | AJP0319             | -33.646264 | 22.194532 | I                       | 1           | <i>b</i>           |
|                 | Prince Albert             | AJP0789             | -33.358260 | 22.683330 | A                       | 1           | <i>b</i>           |
|                 | Riversdal                 | AJP0375             | -33.871438 | 21.447890 | D                       | -           | <i>a</i>           |
|                 | Swellendam                | AJP0162             | -33.657569 | 20.585944 | B                       | 1           | <i>a</i>           |
|                 |                           | AJP0280             | -33.711470 | 20.596740 | B                       | 1           | <i>a</i>           |
|                 | Uniondale                 | AJP0075             | -33.484733 | 22.774033 | F                       | 1           | <i>a</i>           |
|                 |                           | AJP0077             | -33.527900 | 22.803783 | F                       | 1           | <i>b</i>           |
|                 |                           | AJP0080             | -33.559400 | 22.736617 | A                       | 1           | <i>c</i>           |
|                 |                           | AJP0238             | -33.549492 | 22.802571 | A                       | 1           | <i>f</i>           |
|                 |                           | AJP0243             | -33.491221 | 23.282956 | A                       | 1           | <i>b</i>           |
|                 |                           | AJP0274             | -33.515851 | 23.206252 | A                       | 1           | <i>a</i>           |
|                 |                           | AJP0275             | -33.496553 | 23.102923 | F                       | 1           | <i>c</i>           |
|                 |                           | AJP0306             | -33.548124 | 22.979498 | A                       | -           | <i>b</i>           |
|                 |                           | AJP0307             | -33.538869 | 22.901916 | F                       | 1           | <i>a</i>           |
